# Supplementary material for: Genetic Code Expansion: A Powerful Tool for Understanding the Physiological Consequences of Oxidative Stress Protein Modifications
Source: Hindawi journal article supplement (doi:10.1155/2018/7607463), 2018-01-01
Supplement: f1 [file 7607463.f1.pdf]

**SUPPLEMENTARY TABLE S1**

| <b>Number</b> | <b>Ox-PTM Name</b>                                   | <b>Reference</b> |
|---------------|------------------------------------------------------|------------------|
| (1)           | cysteine sulfenic acid                               | [2, 3]           |
| (2)           | cysteine sulfinic acid                               | [2, 3]           |
| (3)           | cysteine mixed disulfide                             | [4]              |
| (4)           | S-nitrosyl cysteine                                  | [3]              |
| (5)           | cysteine cyclic sulfenamide                          | [2, 3]           |
| (6)           | cysteine glutathionylation                           | [3]              |
| (7)           | cysteine thiosulfinate                               | [2]              |
| (8)           | cysteine disulfide                                   | [2-4]            |
| (9)           | cysteine sulfonic acid                               | [2, 3]           |
| (10)          | Prx cysteine phosphoryl sulfinic enzyme intermediate | [2]              |
| (11)          | methionine sulfoxide                                 | [4, 5]           |
| (12)          | methionine sulfone                                   | [5]              |
| (13)          | 3-nitrotyrosine                                      | [6]              |
| (14)          | 3,4-dihydrophenylalanine (DOPA)                      | [6]              |
| (15)          | dopaquinone (DQ)                                     | [6]              |
| (16)          | DQ protein conjugate adduct                          | [6]              |
| (17)          | 3,3'-dityrosine                                      | [6]              |
| (18)          | 3-aminotyrosine                                      | [6]              |
| (19)          | Quinone imine (QI)                                   | [6]              |
| (20)          | QI protein conjugate adduct                          | [6]              |
| (21)          | 3-chlorotyrosine                                     | [6]              |
| (22)          | 3,5-dichlorotyrosine                                 | [6]              |
| (23)          | 3-bromotyrosine                                      | [6]              |
| (24)          | 3,5-dibromotyrosine                                  | [6]              |
| (25)          | 3-iodotyrosine                                       | [6]              |
| (26)          | 3,5-iodotyrosine                                     | [6]              |
| (27)          | 2-hydroxytryptophan                                  | [4, 7]           |
| (28)          | 4-hydroxytryptophan                                  | [4, 7]           |
| (29)          | 5-hydroxytryptophan                                  | [4, 7]           |
| (30)          | 6-hydroxytryptophan                                  | [4, 7]           |
| (31)          | 7-hydroxytryptophan                                  | [4, 7]           |
| (32)          | dihydroxytryptophan                                  | [7]              |
| (33)          | 2-nitrotryptophan                                    | [7]              |
| (34)          | 4-nitrotryptophan                                    | [7]              |
| (35)          | 5-nitrotryptophan                                    | [7]              |
| (36)          | 6-nitrotryptophan                                    | [7]              |
| (37)          | 7-nitrotryptophan                                    | [7]              |

| Number | Ox-PTM Name                                           | Reference |
|--------|-------------------------------------------------------|-----------|
| (38)   | 1-nitrotryptophan                                     | [7]       |
| (39)   | 1-nitrosotryptophan                                   | [7]       |
| (40)   | 5-hydroxy-6-nitrotryptophan                           | [7]       |
| (41)   | N-formylkynurenine                                    | [4, 7]    |
| (42)   | 3-hydroxykynurenine                                   | [4]       |
| (43)   | Oxindole-3-alanine                                    | [7]       |
| (44)   | kynurenine                                            | [7]       |
| (45)   | 2-oxohistidine                                        | [4, 8]    |
| (46)   | Asparagine (Ox-PTM histidine)                         | [4]       |
| (47)   | Aspartate (Ox-PTM histidine)                          | [4]       |
| (48)   | 4-hydroxyphenylalanine                                | [4]       |
| (49)   | 2-hydroxyphenylalanine                                | [4, 6]    |
| (50)   | 3-hydroxyphenylalanine                                | [4, 6]    |
| (51)   | 2-alkenal Michael adduct (Ox-PTM histidine)           | [8]       |
| (52)   | 4-hydroxy-2-alkenal Michael adduct (Ox-PTM histidine) | [8]       |
| (53)   | Aminadipic semialdehyde (Ox-PTM lysine)               | [4, 8]    |
| (54)   | 2-alkenal Michael adduct (Ox-PTM lysine)              | [8]       |
| (55)   | 4-hydroxy-2-alkenal Michael adduct (Ox-PTM lysine)    | [8]       |
| (56)   | FDP adduct (Ox-PTM lysine)                            | [8]       |
| (57)   | N-propenallysine                                      | [8]       |
| (58)   | DHP adduct (Ox-PTM lysine)                            | [8]       |
| (59)   | pyridium DHP (Ox-PTM lysine)                          | [8]       |
| (60)   | Glutamylsemialdehyde (Ox-PTM arginine)                | [4]       |
| (61)   | 3-hydroxyleucine                                      | [4]       |
| (62)   | 4-hydroxyleucine                                      | [4]       |
| (63)   | 3-hydroxyvaline                                       | [4]       |
| (64)   | 4-hydroxyglutamic acid                                | [4]       |
| (65)   | 2-amino-3-ketobutyric acid                            | [4]       |

Supplementary Table S1: List of Ox-PTMs identified following oxidative stress in cells or exposure of protein *in vitro* to ROS and RNOS.
